# Supplementary material for: Characterization of different stages of Maillard reaction in soy: impact on physicochemical properties and immunogenicity of soy proteins
Source: Royal Society of Chemistry journal article supplement (doi:10.1039/d4fo04400b), 2025-01-01
Supplement: d4fo04400b1.pdf [file d4fo04400b1.pdf]

# Supplementary data

Manuscript title "Soy derived Maillard reaction products (MRPs) are recognized by AGE-receptors and promote pro-inflammatory response in human derived monocytes"

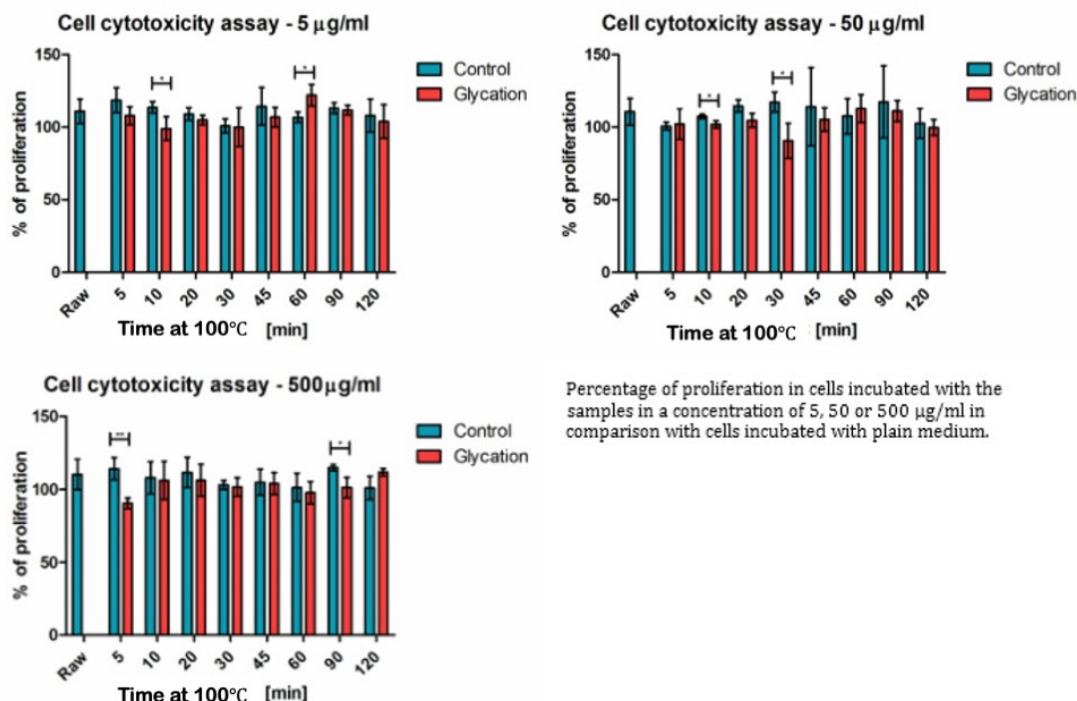

**Supplementary Figure 1.** No cytotoxicity of SPEs was observed after 24 hours of incubation of Caco-2 cells with SPEs with any of the tested concentrations 5, 50 and 500 µg/ml (shown in supplemental Figure 1). For all three concentrations, the amount of proliferation in the control and G-SP was stable, with the control samples showing a higher mean and median when compared to the G-SP. However, the mean and median of the G-SP was always above 100%.

| Genes  | Forward                    | Reverse                    |
|--------|----------------------------|----------------------------|
| PUM1   | TGAGGTGTGCACCATGAAC        | CAGAATGTGCTTGCCATAGG       |
| IL-1B  | TTCGACACATGGGATAACGAGG     | TTTTTGCTGTGAGTCCCGGAG      |
| IL-8   | CTGATTCTGCAGCTCTGTG        | GGGTGGAAAGTTTGAGATATG      |
| TNFα   | CTT-CTG-CCT-GCT-GCA-CTT-TG | GTC-ACT-CGG-GGT-TCG-AGA-AG |
| IL-10  | TCAAGGCGCATGTGAACTCC       | GATGTCAAACCTCACTCATGGCT    |
| RAGE   | GCT-TGG-AAG-GTC-CTG-TCT-CC | CAC-GGA-CTC-GGT-AGT-TGG-AC |
| LGALS3 | GTGAAGCCCAATGCAAACAGA      | AGCGTGGGTAAAGTGAAGG        |
| CD209  | TCAAGCAGTATTGGAACAGAGGA    | CAGGAGGCTGCGGACTTTTT       |
| CD86   | CTGCTCATCTATACCGGTTACC     | GGAAACGTCGTACAGTTCTGTG     |

**Supplementary Figure 2.** Primers used in the PBMCs stimulation and cytokine measurement

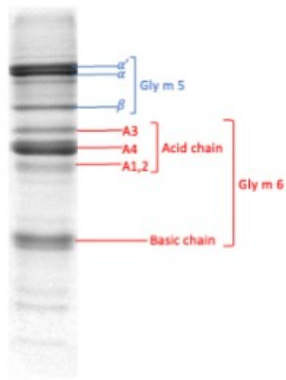

**Supplementary Figure 3.** Depiction of main soy proteins of raw soy

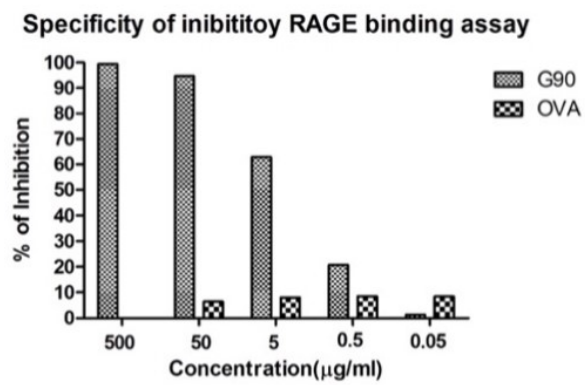

**Supplementary Figure 4.** Optimization of sRAGE competition ELISA with G-SP 90 minutes (G90)

## Ratios

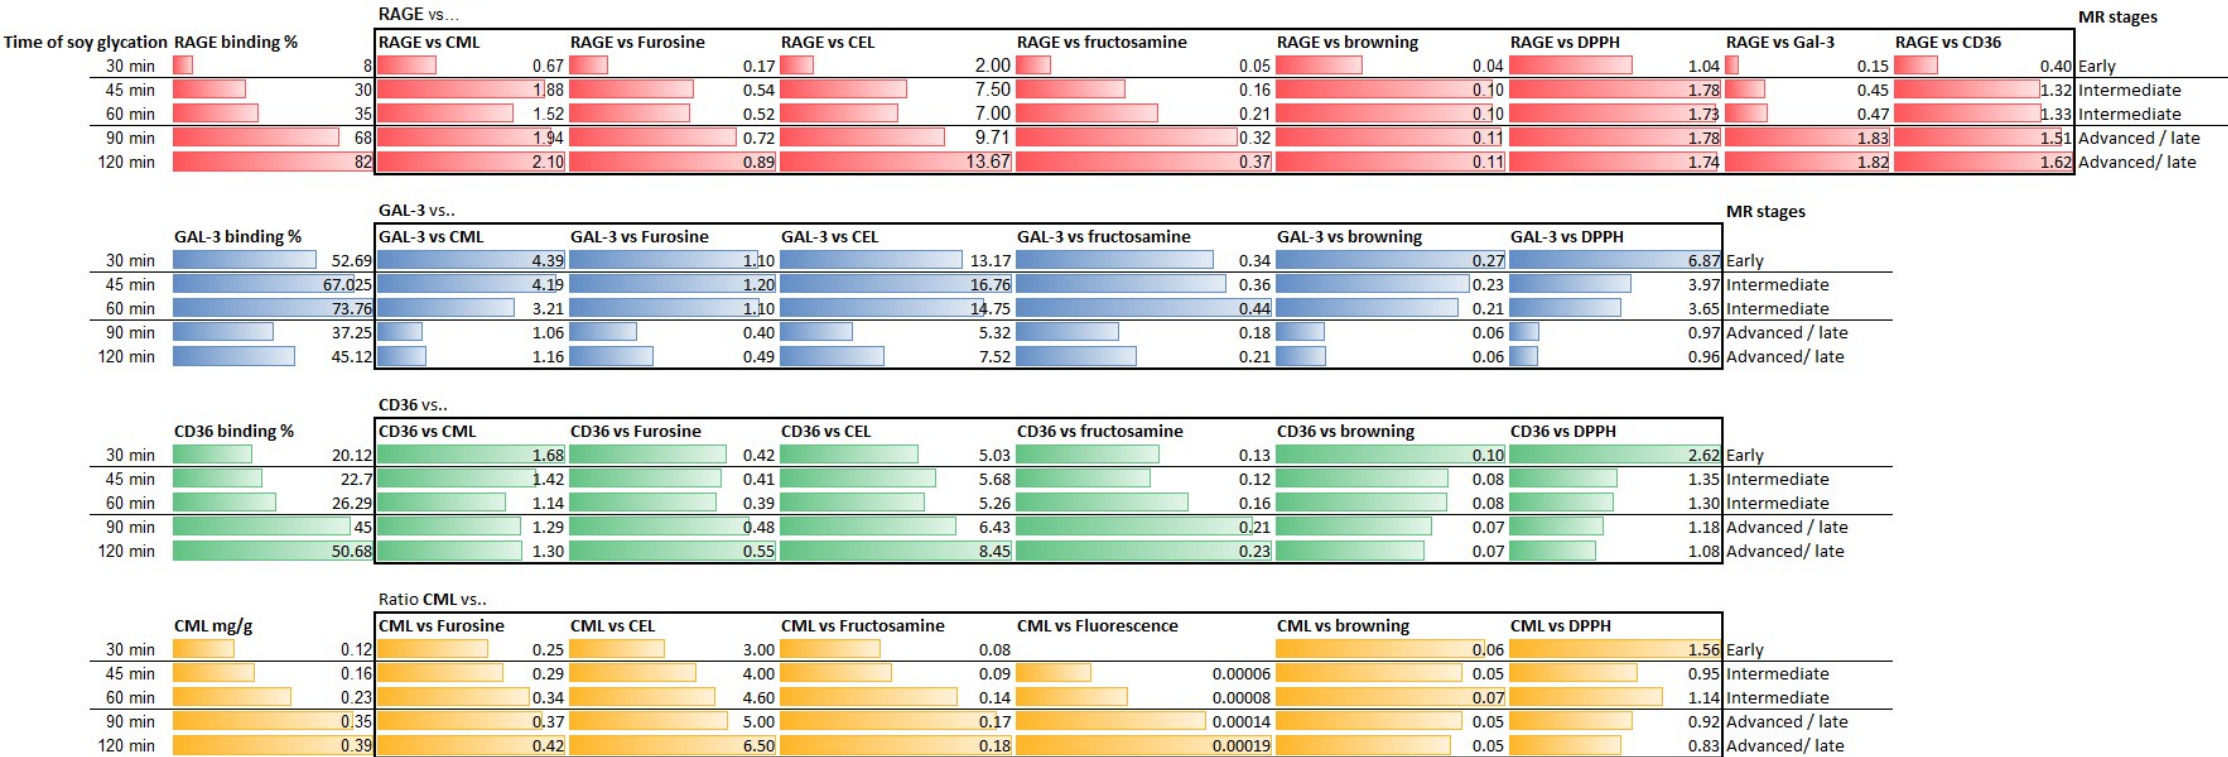

**Supplementary Figure 5.** Calculated ratios of AGE receptor binding and several parameters measured in the study.
